# Supplementary material for: Pleiotropic Effects of Deubiquitinating Enzyme Ubp5 on Growth and Pathogenesis of Cryptococcus neoformans
Source: PubMed Central journal article supplement (PMC3375289; doi:10.1371/journal.pone.0038326), 2012-06-14
Supplement: pone.0038326.s004.pdf [file pone.0038326.s004.pdf]

**Table S1.** Primers used in this study.

| Primer | Sequence(5'-3')                      | Function                                    |
|--------|--------------------------------------|---------------------------------------------|
| WF0001 | CTGCCAAGAGTAAAGCAGAT                 | Constructing of knocking-out cassette/UBP5  |
| WF0002 | GTCATAGCTGTTTCTGGTCAACATCTCGTCCAAACT | Constructing of knocking-out cassette/UBP5  |
| WF0003 | CTGGCCGTCGTTTACTTACACACATTTGCGAACTC  | Constructing of knocking-out cassette       |
| WF0004 | GCAAGGTGCATAGACTAACC                 | Constructing of knocking-out cassette/UBP5  |
| WF0009 | TGCTCTCAGCAACTTCTT                   | Constructing of knocking-out cassette/OTU1  |
| WF0010 | GTCATAGCTGTTTCTGCATCTATGGTGGTGGTTTCT | Constructing of knocking-out cassette/OTU1  |
| WF0011 | CTGGCCGTCGTTTACACCCATAATCCGAAGAGAAT  | Constructing of knocking-out cassette/OTU1  |
| WF0012 | CTGGCTAACAAAGTTCGTTT                 | Constructing of knocking-out cassette/OTU1  |
| WF0033 | CTCCTTCTCTCGTGCATCT                  | Constructing of knocking-out cassette/RPN11 |
| WF0034 | GTCATAGCTGTTTCTGACGCGAGCGTCATCTTCTAT | Constructing of knocking-out cassette/RPN11 |
| WF0035 | CTGGCCGTCGTTTACGCTCGAAAACGACAATGACA  | Constructing of knocking-out cassette/RPN11 |
| WF0036 | ACGTGGGATGCCTAGGTA AAA               | Constructing of knocking-out cassette/RPN11 |
| WF0037 | TGCTCGGTAAGTCCTCAACC                 | Constructing of knocking-out cassette/UBP13 |
| WF0038 | GTCATAGCTGTTTCTGCCAAAGACAGGCGAGTAACC | Constructing of knocking-out cassette/UBP13 |
| WF0039 | CTGGCCGTCGTTTACGATTGTCAACCCCATCATC   | Constructing of knocking-out cassette/UBP13 |
| WF0040 | TTGAGAGGACGTCTGTGGTG                 | Constructing of knocking-out cassette/UBP13 |
| WF0045 | GATGGCCCCTTACTCATCCT                 | Constructing of knocking-out cassette/UBP7  |
| WF0046 | GTCATAGCTGTTTCTGCACAAGGAATGCCCTGAAAT | Constructing of knocking-out cassette/UBP7  |
| WF0047 | CTGGCCGTCGTTTACCACTTGACGCGTGTGTTTT   | Constructing of knocking-out cassette/UBP7  |

|           |                                       |                                                   |
|-----------|---------------------------------------|---------------------------------------------------|
| WF0048    | GGCAGAAGCTGTCTCAAAC                   | Constructing of knocking-out cassette/UBP7        |
| WF0065    | TTGGTCTATCCAGACACACA                  | Constructing of knocking-out cassette/UBP14       |
| WF0068    | TATGGTCGTGATGAAGATGA                  | Constructing of knocking-out cassette/UBP14       |
| WF0069    | GAGATTGGAGAGGATGTCAA                  | Constructing of knocking-out cassette/DOA4        |
| WF0070    | GTCATAGCTGTTTCTG GCGTTCGAACCATACTTTG  | Constructing of knocking-out cassette/DOA4        |
| WF0071    | CTGGCCGTCGTTTTAC AAGAAGAGTACTGCGATTGG | Constructing of knocking-out cassette/DOA4        |
| WF0072    | AGGACAGAAGACAGGAAAAA                  | Constructing of knocking-out cassette/DOA4        |
| M13F      | GTAACACGACGGCCAG                      | Constructing of knocking-out cassette             |
| M13R      | CAGGAAACAGCTATGAC                     | Constructing of knocking-out cassette             |
| WF0104-cp | TCCCAGCATTGTGATTGAAA                  | Analysis of proper homologous recombination/UBP5  |
| WF0912-cp | GGTCACCCTTTTCATGCACT                  | Analysis of proper homologous recombination/OTU1  |
| WF3336-cp | TCTGGCAAGTCAATGCTGTC                  | Analysis of proper homologous recombination/RPN11 |
| WF3740-cp | TCGTCGTGGGTGATGTTAAA                  | Analysis of proper homologous recombination/UBP13 |
| WF4548-cp | GAATCATTCCCCTCTCGTCA                  | Analysis of proper homologous recombination/UBP7  |
| WF6568-cp | GCAGGGTGTATTATCGACAT                  | Analysis of proper homologous recombination/UBP14 |
| WF6972-cp | CAAACATAACATGACGCATC                  | Analysis of proper homologous recombination/DOA4  |
| Re0104-F  | CGAGCATGCATCTAGAACTCAAACGAGCAGAACAT   | Reconstitution for <i>Cn-ubp5Δ</i> mutant         |
| Re0104-R  | AATTGGGCCCTCTAGAAGCTTTAGACTGCAAGAGC   | Reconstitution for <i>Cn-ubp5Δ</i> mutant         |
| Probe14-F | CGAATTGAGCACTGGAGTCA                  | Creation of UB5 Probe for Southern analysis       |
| Probe14-R | AGTACGGGCCCTTCTTTGTT                  | Creation of UB5 Probe for Southern analysis       |

|                |                         |                                             |
|----------------|-------------------------|---------------------------------------------|
| Neo-F          | TATGTCCTGATAGCGGTCCG    | Creation of NEO Probe for Southern analysis |
| Neo-R          | AAGATGGATTGCACGCAGG     | Creation of NEO Probe for Southern analysis |
| Nat-F          | ACCTCTGGCTGGAGGTCAC     | Creation of NAT Probe for Southern analysis |
| Nat-R          | GGGCATGCTCATGTAGAGC     | Creation of NAT Probe for Southern analysis |
| GPD1-a         | AGTATGACTCCAACAATGGTCCG | Real time PCR                               |
| GPD1-b         | AGACAAACATCGGAGCATCAGC  | Real time PCR                               |
| AGS1-a         | TACCGATGGCCCTTTACTCTA   | Real time PCR                               |
| AGS1-b         | AGGAATACACCATGGATGGAAG  | Real time PCR                               |
| UBI4-a         | CACCTTGTTCTCCGTCTG      | Real time PCR                               |
| UBI4-b         | TTGGAGGATGAGGACAATC     | Real time PCR                               |
| MF $\alpha$ -a | ACGCCTTCACTGCCATCTTC    | Real time PCR                               |
| MF $\alpha$ -b | GACGCATAGGGTCATGCCAC    | Real time PCR                               |
